# Supplementary material for: Food as Commons or Commodity? Exploring the Links between Normative Valuations and Agency in Food Transition
Source: Preprints.org preprint supplement (doi:10.20944/preprints201701.0073.v1), 2017-01-16
Supplement: Supplementary file 3 [file Suppl Mat CODING FORM Food Commons-commodity JL Vivero.docx]

**Food as commons or commodity? Exploring the links between normative valuations and agency in food transition**

José Luis Vivero Pol1,2

Universite catholique of Louvain, Belgium Email: [jose-luis.viveropol@uclouvain.be](mailto:jose-luis.viveropol@uclouvain.be)

1 Biodiversity Governance Research Unit (BIOGOV), Center for the Philosophy of Law (CPDR) - UCL

2 Earth and Life Institute, Faculty of Biological, Agricultural and Environmental Engineering - UCL

This text includes supplementary material for the manuscript submitted to Sustainability. It includes the coding form for the variables analysed, complete dataset and the full description of each respondent (position, institution, country, description of activities and website). The respondents are anonymised and each one is identified with a number in the Excel sheet.

The author

**SUPPLEMENTARY MATERIAL – CODING FORM**

A.- INDEPENDENT VARIABLES

**Qw0 Number of interviewee (food-related professional)** N=95

**Qw1 Country**

| Qw1a | 1.- Hunger-stricken country | 14.7% |
| --- | --- | --- |
| Qw2a | 2.- Non-hunger stricken country | 85.3% |

**Qw2 Age slot**

| Qw2a | 1.- Below 30 | 28.4% |
| --- | --- | --- |
| Qw2b | 2.- 31-50 | 52.6% |
| Qw2c | 3.- Above 50 | 19% |

**Qw3 Gender**

| Qw3a | 1. Male | 51.6% |
| --- | --- | --- |
| Qw3b | 2. Female | 48.4% |

**Qw4 Food-related experience**

| Qw4a | 1.- Never | 0% |
| --- | --- | --- |
| Qw4b | 2.- Less 3 years | 35.8% |
| Qw4c | 3.- Between 3 and 10 | 39% |
| Qw4d | 4.- More than 10 | 25.2% |

**Qw5 Self-described sector for food-related activities (detail)**

| Qw5a | 1.- Private sector | 6.3% |
| --- | --- | --- |
| Qw5b | 2.- Public sector | 33.7% |
| Qw5c | 3.- Public-Private Partnership | 11.6% |
| Qw5d | 4.- NGO/Civil Society Sector (legal entity) | 30.5% |
| Qw5e | 5.- Self-regulated Collective action (informal arrangement) | 17.9% |

**Qw6 Self-described sector for food-related activities (main groups)**

| Qw6a | 1.- For-profit Sector | 17.9% |
| --- | --- | --- |
| Qw6b | 2.- Public Sector | 33.7% |
| Qw6c | 3.- Third Sector (not-for-profit) | 48.4% |

**Qw7 Personal involvement in actions for food transition**

| Qw7a | Producing food yourself | 57.9% |
| --- | --- | --- |
| Qw7b | Choose locally produced food products | 89.4% |
| Qw7c | Eat organic/ecological foodstuff | 88.4% |
| Qw7d | Recycling food in different ways so as to minimise food waste at home | 73.7% |
| Qw7e | Sending e-mails about food-related issues to my friends | 59% |
| Qw7f | Being part of a group whose purpose is to increase the public awareness on the food system/hunger | 81% |
| Qw7g | Sensitizing close relatives or colleagues in order that they change their food habits | 64.2% |
| Qw7h | Financially supporting an organization that works for a more secure food system/anti-hunger actions | 43.2% |

| Qw7i | Committed Production (Qw7a) | 57.9% |
| --- | --- | --- |
| Qw7j | Committed Consumption (at least two out of three in Qw7b, Qw7c, Qw7d) | 91.6% |
| Qw7k | Committed Food Activism (social network, active membership, awareness raising, funding) (at least two out of four in Qw7e, Qw7f, Qw7g, Qw7h | 77.9% |

B.- SELF-PLACEMENT IN THE TRANSITION LANDSCAPE

**Qw8 Self-placement in the transition landscape**

| qw8a | A SMALL-NICHE activity that improves the existing food system | 22.11% |
| --- | --- | --- |
| qw8b | A SMALL-NICHE activity that struggles against the existing food system |
| qw8c | A SMALL-NICHE activity that builds a different food system |
| qw8d | A MAINSTREAM activity that improves the existing food system | 25.27% |
| qw8e | A MAINSTREAM activity that struggles against the existing food system |
| qw8f | A MAINSTREAM activity that builds a different food system |
| qw8g | A CONVENTIONAL activity that improves the existing food system | 10.53% |
| qw8h | A CONVENTIONAL activity that struggles against the existing food system |
| qw8i | A CONVENTIONAL activity that builds a different food system |
| qw8j | An ALTERNATIVE activity that improves the existing food system | 23.16% |
| qw8k | An ALTERNATIVE activity that struggles against the existing food system |
| qw8l | An ALTERNATIVE activity that builds a different food system |
| qw8m | A REVOLUTIONARY activity that improves the existing food system | 18.95% |
| qw8n | A REVOLUTIONARY activity that struggles against the existing food system |
| qw8o | A REVOLUTIONARY activity that builds a different food system |

**Qw9 Working at Dominant Socio-technical Regime or in Innovative Niches**

| Qw9a | Dominant Socio-technical regime (Conventional + Mainstream) | 35.8% |
| --- | --- | --- |
| Qw9b | Innovative niches (small-niche + alternative + revolutionary) | 64.2% |

**Qw10 Gradual Reformers or Transformers (Builders or Strugglers)**

| Qw10a | Gradual Reformers (those who want to improve the existing food system) | 26.3% |
| --- | --- | --- |
| Qw10b | Transformers (those who want to build a new or struggle against the existing food system) | 73.7% |

**Qw11 Alter-hegemonic (Builders) or Counter-hegemonic (Strugglers)**

| Qw11a | Alter-hegemonic (building a different food system) | 40% |
| --- | --- | --- |
| Qw11b | Counter-hegemonic (struggling against the existing food system) | 33.7% |

C.- PREFERRED FOOD POLICY BELIEFS within

MULTI-DIMENSIONAL STATEMENTS or COMMONS-ORIENTED

**Ranking multi-dimensional statements (1 strongly disagree, 2, disagree, 3 no position, 4 agree, 5 strongly agree)**

Qw12a Food is a common good that shall be governed by citizens and being beneficial for all members of society

Qw12b Every citizen should be entitled to get a minimum amount of food (or its money equivalent) to eat every day

Qw12c The legal minimum wage should be always equal to the price of the Food Basket in every country

Qw12d The financial speculation of food products should be banned by law

Qw12e Free food programmes should be part of Universal Food Coverage to those that cannot afford it

Qw12f Living organisms, such as seeds, animal breeds or genes shall not be patented by individuals or corporations

**Qw13 Preferred Food Policy Beliefs (Strongly and Agree, 4-5)**

| Qw13a | Food is a common good that shall be governed by citizens and being beneficial for all members of society | 85.3% |
| --- | --- | --- |
| Qw13b | Every citizen should be entitled to get a minimum amount of food (or its money equivalent) to eat every day | 94.7% |
| Qw13c | The legal minimum wage should be always equal to the price of the Food Basket in every country | 57.9% |
| Qw13d | The financial speculation of food products should be banned by law | 76.8% |
| Qw13e | Free food programmes should be part of Universal Food Coverage to those that cannot afford it | 76.8% |
| Qw13f | Living organisms, such as seeds, animal breeds or genes shall not be patented by individuals or corporations | 81% |

**Qw14 Opposed Food Policy Beliefs (Strongly and Disagree, 1-2)**

| Qw14a | Food is a common good that shall be governed by citizens and being beneficial for all members of society | 4.2% |
| --- | --- | --- |
| Qw14b | Every citizen should be entitled to get a minimum amount of food (or its money equivalent) to eat every day | 4.2% |
| Qw14c | The legal minimum wage should be always equal to the price of the Food Basket in every country | 23.2% |
| Qw14d | The financial speculation of food products should be banned by law | 5.3% |
| Qw14e | Free food programmes should be part of Universal Food Coverage to those that cannot afford it | 7.4% |
| Qw14f | Living organisms, such as seeds, animal breeds or genes shall not be patented by individuals or corporations | 9.5% |

D.- SELECTED FOOD POLICY BELIEFS

(MARKET-ORIENTED vs COMMONS-ORIENTED)

**Qw15 Rank the three Food Policy Beliefs you agree the most (1,2,3)**

Qw15a Food can be at the same time a private good and an essential resource for our survival and identity

Qw15b Current market rules with less State intervention will enable us to reach a food secure world

Qw15c Food is like any other commodity

Qw15d The current food system is capable of producing food in a sustainable way

Qw15e The state has an important role in producing, distributing and guaranteeing food for all the citizens

Qw15f Patents are essential to foster innovation in agricultural production

Qw15g If food is distributed according to the market rules, we will never achieve food security for all

Qw15h Food and nutrition security is a global public good

Qw15i Biofuel cultivation does not affect hunger

**Qw15 Rank the three Food Policy Beliefs you agree the most (1) the most, (2), the second, (3) the third, (4) Non-selected**

Qw15aa Food can be at the same time a private good and an essential resource for our survival and identity

Qw15ba Current market rules with less State intervention will enable us to reach a food secure world

Qw15ca Food is like any other commodity

Qw15da The current food system is capable of producing food in a sustainable way

Qw15ea The state has an important role in producing, distributing and guaranteeing food for all the citizens

Qw15fa Patents are essential to foster innovation in agricultural production

Qw15ga If food is distributed according to the market rules, we will never achieve food security for all

Qw15ha Food and nutrition security is a global public good

Qw15ia Biofuel cultivation does not affect hunger

**Qw16 Selected Food Policy Beliefs (1,2,3)**

|  |  | Selected Policy Belief (1-3) | Not selected Policy Belief |
| --- | --- | --- | --- |
| Qw16a | Food can be at the same time a private good and an essential resource for our survival and identity | 50.5% | 49.5% |
| Qw16b | Current market rules with less State intervention will enable us to reach a food secure world | 6.3% | 93.7% |
| Qw16c | Food is like any other commodity | 0% | 100 |
| Qw16d | The current food system is capable of producing food in a sustainable way | 26.3% | 73.7% |
| Qw16e | The state has an important role in producing, distributing and guaranteeing food for all the citizens | 68.4% | 31.6% |
| Qw16f | Patents are essential to foster innovation in agricultural production | 6.3% | 93.& |
| Qw16g | If food is distributed according to the market rules, we will never achieve food security for all | 59% | 41% |
| Qw16h | Food and nutrition security is a global public good | 82.1% | 17.9% |
| Qw16i | Biofuel cultivation does not affect hunger | 1% | 99% |

**Qw17 Not selected Food Policy Beliefs**

Qw17a Food can be at the same time a private good and an essential resource for our survival and identity

Qw17b Current market rules with less State intervention will enable us to reach a food secure world

Qw17c Food is like any other commodity

Qw17d The current food system is capable of producing food in a sustainable way

Qw17e The state has an important role in producing, distributing and guaranteeing food for all the citizens

Qw17f Patents are essential to foster innovation in agricultural production

Qw17g If food is distributed according to the market rules, we will never achieve food security for all

Qw17h Food and nutrition security is a global public good

Qw17i Biofuel cultivation does not affect hunger

**Qw18 Market-oriented VS commons-oriented: Strongly neoliberal, Conventional or Commons-based**

**Qw18a Strongly neoliberal (one is selected) (N=7)**

Qw16b Current market rules with less State intervention will enable us to reach a food secure world (N=6)

Qw16c Food is like any other commodity (N=1)

Qw16i Biofuel cultivation does not affect hunger (N=1)

**Qw18b Conventional (at least two out of three are selected and none strongly neoliberal) (N=17)**

Qw16a Food can be at the same time a private good and an essential resource for our survival and identity (N=51)

Qw16d The current food system is capable of producing food in a sustainable way (N=25)

Qw16f Patents are essential to foster innovation in agricultural production (N=6)

**Qw18c Commons-based (at least two out of three are selected and none strongly neoliberal) (N=74)**

Qw16e The state has an important role in producing, distributing and guaranteeing food for all the citizens (N=67)

Qw16g If food is distributed according to the market rules, we will never achieve food security for all (N=61)

Qw16h Food and nutrition security is a global public good (N=82)

**Qw18d Market-oriented (at least two out of three are selected in strongly neoliberal and conventional) (N=21)**

Qw16b Current market rules with less State intervention will enable us to reach a food secure world (N=6)

Qw16c Food is like any other commodity (N=1)

Qw16i Biofuel cultivation does not affect hunger (N=1)

Qw16a Food can be at the same time a private good and an essential resource for our survival and identity (N=51)

Qw16d The current food system is capable of producing food in a sustainable way (N=25)

Qw16f Patents are essential to foster innovation in agricultural production (N=6)

**Qw18e Mildly commons-based (at least two out of three are selected) (N=74)**

Qw16e The state has an important role in producing, distributing and guaranteeing food for all the citizens (N=67)

Qw16g If food is distributed according to the market rules, we will never achieve food security for all (N=61)

Qw16h Food and nutrition security is a global public good (N=82)

**Qw18f Strongly Commons-based (or against market-oriented) (all three are selected in this cluster) N=34**

Qw16e The state has an important role in producing, distributing and guaranteeing food for all the citizens (N=67)

Qw16g If food is distributed according to the market rules, we will never achieve food security for all (N=61)

Qw16h Food and nutrition security is a global public good (N=82)

| Qw18a | Strongly neoliberal (one is selected) | N=7 | 7.4% |
| --- | --- | --- | --- |
| Qw18b | Conventional (at least two out of three are selected and none strongly neoliberal) | N=17 | 17.9% |
| Qw18c | Commons-based (two or three are selected) | N=74 | 77.9% |
| Qw18d | Market-oriented (two or three are selected in strongly neoliberal and conventional) | N=21 | 22.1% |
| Qw18e | Commons-based (two are selected) | N=74 | 77.9% |
| Qw18f | Strongly Commons-based (or against market-oriented) (all three are selected in this cluster) | N=34 | 35.8% |

E.- PREFERRED FOOD POLICY BELIEFS

(MARKET-ORIENTED vs COMMONS-ORIENTED)

High priority (1-2): 1 Low or no priority (3-0): 0

**Qw19 Food can be at the same time a private good and an essential resource for our survival and identity**

Qw19a High priority (1,2)

Qw19b Low Priority (3,0)

|  |  | **High Priority (1-2)** | **Low / no priority (3-0)** |
| --- | --- | --- | --- |
| Qw19 | Food can be at the same time a private good and an essential resource for our survival and identity | 27.4% | 72.6% |
| Qw20 | Current market rules with less State intervention will enable us to reach a food secure world | 5.3% | 94.7% |
| Qw21 | Food is like any other commodity | 0% | 100% |
| Qw22 | The current food system is capable of producing food in a sustainable way | 14.7% | 85.3% |
| Qw23 | The state has an important role in producing, distributing and guaranteeing food for all the citizens | 25.8% | 64.2% |
| Qw24 | Patents are essential to foster innovation in agricultural production | 1% | 99% |
| Qw25 | If food is distributed according to the market rules, we will never achieve food security for all | 47.4% | 52.6% |
| Qw26 | Food and nutrition security is a global public good | 69.5% | 30.5% |
| Qw27 | Biofuel cultivation does not affect hunger | 0% | 100 |

F.- VALUATION OF FOOD DIMENSIONS

| Qw28a | 1. Food is a basic human need every human being shall enjoy every day, regardless his/her purchasing power | 56.8% |
| --- | --- | --- |
| Qw28b | 2. Freedom from hunger is a human right as important as the right not to be tortured | 43.2% |
|  |  |  |
| Qw29a | 1. The price of food in the market reflects well its value for human beings | 58.9% |
| Qw29b | 2. Food shall be cheap so as to enable more people to get access to it | 41.1% |
|  |  |  |
| Qw30a | 1. Food is a common good that should be enjoyed by all humans and governed in a common way | 62.1% |
| Qw30b | 2. Food is a human right that shall be guaranteed by the state to all | 37.9% |
|  |  |  |
| Qw31a | 1. Food is a life-sustaining commodity that cannot be treated as other commodities | 65.3% |
| Qw31b | 2. Food is an important part of my cultural identity | 34.7% |
|  |  |  |
| Qw32a | 1. Food, as a scarce resource, has to be distributed according to market rules | 11.6% |
| Qw32b | 2. The State has the obligation to guarantee the right to food to every citizen | 88.4% |
|  |  |  |
| Qw33a | 1. You can eat as long as you have money to purchase the food or means to produce it | 51.6% |
| Qw33b | 2. Food is a natural resource that it is better exploited by the State | 48.4% |
|  |  |  |
| Qw34a | 1. Food has to be beautiful and cheap | 53.7% |
| Qw34b | 2. Food has to be nutritious and expensive | 46.3% |
|  |  |  |
| Qw35a | 1. Food is a natural resource that it is better exploited by the private sector | 12.6% |
| Qw35b | 2. Food is a natural resource that it is better exploited by citizens | 87.4% |
|  |  |  |
| Qw36a | 1. Food is a commodity whose access is exclusively determined by the purchasing power of any given customer | 28.4% |
| Qw36b | 2. Free food for all is good | 71.6% |
|  |  |  |
| Qw37a | 1. The best use of any food commodity is where it can get the best price, either fuel, feeding livestock or exporting market | 16.8% |
| Qw37b | 2. A bread loaf (or a culturally-appropriated equivalent) should be guaranteed to every citizen every day | 83.2% |

**Construction of Clusters for Analysis**

**Mono-dimensional Reformers 1 Qw01 (N=15)**

**Counter-hegemonic 2 Qw02 (N=7)**

**Alter-hegemonic 3 Qw03 (N=14)**

**Multi-dimensional Reformers 4 Qw04 (N=10)**

**Counter—hegemonic 5 Qw05 (N=25)**

**Alter-hegemonic 6 Qw06 (N=24)**

**Mono-dimensional Qw07**

**Multi-dimensional Qw08**

**Mono-dimensional Transformers Qw09 (N=36)**

**Multi-dimensional Transformers Qw10 (N=59)**

**Strongly Mono-dimensional qw42 (N=18)**

**Mildly mono-dimensional Qw100 (N=18)**

**Regime qw9a (N=34)**

**Niche qw9b (N=61)**

**Gradual Reformer qw10a (N=25)**

**Transformer qw10b (N=70)**

**Alter-hegemonic qw11a (N=38)**

**Counter-hegemonic qw11b (N=32)**

**Small Niche Qw10s (N=21)**

**Alternative Niche Qw11 (N=22)**

**Revolutionary Niche Qw12 (N=18)**

**Revolutionary Niches –Alter-hegemonic – Multi-dimensional Qw13 (N=9)**

**Alternative Niches – Gradual Reformers – Mono-dimensional Qw14 (N=5)**

**Small Niches – Counter-hegemonic – Multi-dimensional Qw15 (N=9)**

**Regime – Gradual Reformers – Mono-dimensional Qw16 (N=6)**

**Clusters based on Food Policy Beliefs**

**Cluster1 Largely multi-dimensional, mostly transformers Qw20 (N=59)**

**Cluster2 Slightly Multi-dimensional Qw21 (N=26)**

**Cluster 3 Markedly Mono-dimensional Qw22 (N=10)**

**SUPPELEMENTARY MATERIAL: Brief description of the sample (N=95) with specific food valuation and political stance**

1. **Mono-dimensional Reformers (N=15)**

| **N** | **Name (organization/enterprise /group)** | **Country** | **Position / description of activities** | **Institution** | **Website** |
| --- | --- | --- | --- | --- | --- |
| **2** | Citizens’ Initiative “Despertemos Guatemala” | Guatemala | Member of the Steering Committee that launched the Initiative "I have something to give" (Tengo Algo que Dar) to mobilise young urban people to get acquainted to malnutrition problems in the rural areas. | Advocacy and activist collective initiative to raise awareness about the most pressing problems affecting the country and what citizenship and civil society can do to address them. Chronic malnutrition, affecting nearly 50% of under-five children, is a priority issue. The Initiative "I have something to give" (Tengo Algo que Dar) was launched in 2012 to mobilise young urban people to get acquainted to malnutrition problems in the rural areas. | <http://despertemosguatemala.org/web/> |
| **5** | Global Harvest Initiative | International (USA) | Executive Director | A corporate advocacy group that works on policy analysis, education and advocacy about the solutions to improve agricultural productivity and conserve natural resources and to improve food and nutrition security. The biggest transnational agri-food corporations are members. | www.globalharvestinitiative.org |
| **18** | Wageningen University | Netherlands | Researcher on EU governance of food security | Dutch university specialised in food and agricultural issues with a remarkable international outreach <http://www.wageningenur.nl/en/wageningen-university.htm> |  |
| **30** | Gorta Self Help Africa | Ireland | Nutrition adviser working on agricultural/livelihoods, nutrition and small entrepreneurship in Africa. | Irish NGO with offices in USA and UK. Established after the Ethiopian famine, it works in 12 countries in Africa, addressing the root causes of hunger and famine and focusing on small holder farmers (men and women) and markets. | <http://www.selfhelpafrica.org/ie/> |
| **33** | Rust Belt Riders Composting | USA | Employee and co-owner of the cooperative | Service-fee organic waste removal initiative available to Cleveland residents (US). It is organised as a co-operative run and owned by the workers. We divert compostable organics from entering landfills by working with community gardens to cultivate high quality compost | [www.rustbeltriderscomposting.com](http://www.rustbeltriderscomposting.com/) |
| **36** | Bioversity International | International (Italy) | Regional representative in Central America. Researcher on genetic resources, biodiversity, climate change and socio-cultural issues. | A global research-for-development organization, member of CGIAR and based in Rome, that delivers scientific evidence, management practices and policy options to use and safeguard agricultural and tree biodiversity to attain sustainable global food and nutrition security | <http://www.bioversityinternational.org/> |
| **40** | European Commission | International (Belgium) | Public servant (agronomist) dealing with Food Security issues in EU Delegations (DG RELEX) | The EC is the European Union's politically independent executive arm. It draws up proposals for new European legislation, and it implements the decisions of the European Parliament and the Council of the EU. | <http://ec.europa.eu/index_en.htm> |
| **44** | Vrije Universiteit Brussel | Belgium | Researcher in cross modal integration, between the sense of taste and hearing | Belgium University based in Brussels. Acoustic Sensing Lab. Project T.A.S.TE. focused on Testing Auditory Solutions Towards the Improvement of the Tasting Experience (since 2013). | <http://aclab.flavors.me/> |
| **53** | Universidad del Valle de Guatemala | Guatemala | Researcher on ethnobotany, agroforestry practices and traditional uses of medicinal of plants in afro-descendent communities in Panama and Guatemala | A private and non-religious university in Guatemala city. | <http://www.uvg.edu.gt/> |
| **59** | FANTA III Food and Nutrition Technical Assistance Project | USA | Food Security specialist providing technical assistance to various offices within the United States Agency for International Development (USAID) that implement food security-focused programming around the world, from humanitarian food assistance programs. | This a 5-year agreement between the US Agency for International Development (USAID) and FHI 360, a US-based international NGO. FANTA aims to improve the health and well-being of vulnerable groups through technical support in the areas of maternal and child health and nutrition in development and emergency contexts and food security. | <http://www.fantaproject.org/> |
| **65** | CIHEAM/IAMM - Montpellier SupAgro - UniCT | International (France) | PhD Candidate working in a multi-institutional project to identify metrics of Sustainable Diets and Food Systems between the CIHEAM/IAMM Montpellier, Bioversity International, University of Catania and Montpellier SupAgro. | The IAMM is one of four Mediterranean agronomic institutes of the International Centre for Advanced Mediterranean Agronomic Studies (CIHEAM), an intergovernmental organisation created in 1962 by the OECD and the Council of Europe and composed of 13 member states. | <http://www.iamm.fr/> |
| **66** | International Institute of Rural Reconstruction | International (Philippnes) | Program associate for food and nutrition security, dealing with poverty alleviation, wealth creation, disaster risk reduction and climate change adaptation and applied learning. | A training institute with an international scope created by Dr Y.C. James Yen, a Chinese entrepreneur and social activist, that launched a rural education programme in China that targeted more than 200 million peasants. Currently working in more than 15 countries, mostly in Asia and Africa. | <http://iirr.org/> |
| **68** | Katholieke Universiteit Leuven | Belgium | PhD research on multisensory gastronomic experiences | Joint collaboration between the Laboratory of Experimental Psychology at KULeuven and the Acoustic Sensing Lab of Vrije Universiteit Brussels | <http://ppw.kuleuven.be/home/english/research/lep> |
| **84** | Ministry of Foreign Affairs | Netherlands | Responsible for the Dutch policy on food and nutrition security, including its implementation, worth 300 million euro annually. | Governmental institution responsible for foreign affairs, international trade and Development Cooperation. | <https://www.government.nl/ministries/ministry-of-foreign-affairs> |
| **93** | FAO | International (Italy) | Facilitating policy dialogue and stakeholder involvement related to Food Security and Nutrition issues. | United Nations Organisation for food and agriculture | [www.fao.org](http://www.fao.org) |

**B.- Mono-dimensional Counter-hegemonic Transformers (N=7)**

| **N** | **Name (organization/enterprise**  **/group)** | **Country** | **Position / description of activities** | **Institution** | **Website** |
| --- | --- | --- | --- | --- | --- |
| 24 | Disco Soup Paris | France | Member of Disco Soupe-Paris, organising events in Paris. | Disco Soupe is an international network of youth movements organising events (more than 200 in 2014) in 90 cities of 10 countries. It was initiatied in March 2012 in France. They occupy public spaces, raise awareness on food waste and use wasted food to cook meals in convivial events with music. | [www.discosoupe.com](http://www.discosoupe.com/) |
| 26 | Disco Soupe Lille | France | Member of Disco Soupe-Lille | Disco Soupe is an international network of youth movements organising events (more than 200 in 2014) in 90 cities of 10 countries. It was initiatied in March 2012 in France. They occupy public spaces, raise awareness on food waste and use wasted food to cook meals in convivial events with music. | [www.discosoupe.com](http://www.discosoupe.com/) |
| 72 | Citizens Co-op | USA | Member of the voluntary Board of Directors of Citizens Co-op | Citizens Co-op is a community-owned market in downtown Gainesville (Florida) providing local, organic, affordable natural foods. They are also food activists against GMOs and industrial agriculture. They aim to contribute to a more localized food system providing the best food options available. | <http://citizensco-op.com/> |
| 74 | Universidad Central del Ecuador | Ecuador | Researcher in the project "Short Alternative Food Supply Chains in Quito, Ecuador" | The second biggest and oldest public university of Ecaudor. The High Institute of Research and Graduates harbours the doctoral research undertaken by the center. | <http://www.uce.edu.ec/> |
| 83 | Provincial Government of Galapagos Islands | Ecuador | Independent Consultant currently advising on food security issues to the local authorities of Galapagos Province. | The islands’ population (20 thousand) is highly dependent on food from the mainland. Strengthening the local food system involves significant challenges for the current administration, because the legal protection as a National Park prevents many types of conventional agriculture and fishing techniques. Great opportunities for a sustainable transition towards fairer means of production and consumption | <http://www.gobiernogalapagos.gob.ec/direccion-de-produccion-y-desarrollo-humano/> |
| 97 | Food activist and journalist | Argentina | Food writer and journalist | Covering and denouncing the food system in Argentina for different magazines and newspapers. Book published in 2013 “Malcomidos”. Now extending work to Latin America | <https://www.facebook.com/MalcomidosOficial> |
| 99 | Plant a fruit | Kenya | Member of the social enterprise that sells fruit trees for public projects and commonwealth initiatives. | A social enterprise whose goal is to provide a fruit tree to be planted in everybody’s yard, to raise awareness, mitigate global warming and increase food security. We sell fruit seedlings and offer services that include edible landscaping, grafting, training/consultancy, on-farm extension services and implementing CSR projects. | [www.plantafruit.org](http://www.plantafruit.org/) |

**C.- Mono-dimensional Alter-hegemonic Transformers (N=14)**

| **N** | **Name (organization/enterprise**  **/group)** | **Country** | **Position / description of activities** | **Institution** | **Website** |
| --- | --- | --- | --- | --- | --- |
| 1 | Social Entrepreneur, Food Activist, Agricultural consultant | Australia | Social entrepreneur, lecturer, researcher, food and agriculture consultant (in fields as diverse as energy, biology, information technology and business management). Local activist, creative thinker. Food grower in Macarthur region on Sydney’s urban fringe. | Entrepreneur in several companies and consultant enterprises in Australia. Active member of alternative food networks in Sydney. Rural Designer, advocate and teacher.  Member of the MacArthur Future Food Forum | <https://macarthurfuturefood.wordpress.com/about-2/>  http://www.cllm.org.au/PDFs/Projects/ONG/The_Wollondilly_Education_Model.pdf |
| 9 | Ministry of Foreign Affairs | Netherlands | Responsible to follow up food-related UN institutions (such as FAO, WFP, IFAD) and food and nutrition security in the multilateral context | Governmental institution responsible for foreign affairs, international trade and Development Cooperation | https://www.government.nl/ministries/ministry-of-foreign-affairs |
| 11 | Social Entrepreneur, agricultural consultant | New Zealand | Social entrepreneur, Change Manager, lecturer, researcher, focussed on Leadership, Purpose, Results, Innovation, Resilience. Former lecturer on livestock & agriculture | Entrepreneur and consultant supporting agri-food industries with governance and business advice. Providing organisational rebuilding activities for companies in the technology, manufacturing, energy, environment, agricultural, health, and services sectors. | [http://shauncoffey.org](http://shauncoffey.org/) |
| 19 | Universite Catholique de Louvain | Belgium | PhD researcher on legal issues affecting biodiversity, genetic resources and open knowledge, commons. Research on seeds’ property rights and collective actions to build alternative proprietary schemes. | Biodiversity Governance (BIOGOV) is a research unit of the Louvain Open Platform on Ecological and Social Transition (LPTransition) and the Interdisciplinary Institute of Legal Sciences (JUR-I) at the Université catholique de Louvain (UCL) | <http://biogov.uclouvain.be/> |
| 39 | Organic food Consumer | USA | High School Teacher and organic food producer in New Mexico | Organic home vineyard. He grows fruits, nuts and herbs and purchases regularly in local farmers' markets of New Mexico. |  |
| 43 | Wageningen University | Netherlands | Researcher and lecturer on food and agriculture issues with a food-related blog. Specialist on food sovereignty movements, Committee of Food Security and global food governance | Dutch university specialised in food and agricultural issues with a remarkable international outreach | <http://www.wageningenur.nl/en/wageningen-university.htm> |
| 46 | World Food Programme | International (Italy) | Officer dealing with donor relationships, ensuring WFP has enough funds to conduct its food related activities world-wide | United Nations World Food Programme dealing with food-related humanitarian emergencies | [www.wfp.org](http://www.wfp.org) |
| 47 | Transfernation | USA | Founding member and director of this social enterprise aimed to reduce food waste, based in New York City | Nonprofit that aims to create a tech-based application to connect corporations and charitable institutions so food left over from corporate events may be repurposed for those in need. We recently launched Transfernation in Karachi, Pakistan with local restaurants and a volunteer-driven process of redistribution. We aspire to create a cultural revolution which changes the way people view their extra food | http://www.transfernation.org/ |
| 51 | Food Forward Toronto | Canada | A consultant, chef and food activist bringing food and people together in Toronto. Member of the steering committee | Non-profit organization, born in 2010, made up of consumers, activists, businesses and organizations in Toronto, who are connecting to create good food and good food jobs. They value food democracy, food justice, food sovereignty, and economic opportunity. We act together to educate and advocate effectively for healthy food and communities that are inclusive, diverse, ethical, local, and resilient. | <http://pushfoodforward.com/about> |
| 71 | goMarketNC | USA | Founder of alternative food network and innovative hub | goMarket is a foodhub venture with a twofold goal: community development and health initiative. We support initiatives that advance the health and economic well-being of farmers, food producers and eaters in North Carolina. They support projects in alternative food networks, food hubs, farmers’ markets, online shops of fair and organic food, peer-to-peer initiatives. | <http://gomarketnc.com/> |
| 77 | UMeFood - University of Maine | USA | Member of a graduate student group at the university of Maine | Group of graduate and undergraduate students interested on improving the local and university food systems through research, advocacy and education. Collaboration with community activist organizations, local restaurants and political leaders. We are currently working on institutionalizing a formal food systems mentor program for undergrads interested in food systems research. | <https://www.facebook.com/pages/UMe-Food/198265123691115?ref=stream> |
| 85 | Save the Children UK | UK | Policy and Advocacy Adviser in the Nutrition and Hunger Team | British international NGO whose goal is to dramatically reduce the number of children dying or being stunted due to malnutrition. Strategic priorities: Nutrition becomes a political priority for donors and high burden countries, prioritising nutrition with sufficient funding and appropriate policies. Businesses adopt new approaches to address undernutrition and build an evidence base which can be scaled up. At the country level will work to strengthen SUN civil society network through effective accountability and monitoring frameworks. | [www.savethechildren.org.uk](http://www.savethechildren.org.uk/) |
| 86 | Oxford University | UK | Senior Visiting Research Associate at Environmental Change Institute. Economist focused on exploring the mindset needed to address the 21st century’s social and ecological challenges. Creator of the doughnut of planetary and social boundaries. | It was established in 1991 to organize and promote interdisciplinary research on the nature, causes and impact of environmental change and to contribute to the development of management strategies for coping with future environmental change. One of the research streams is related to food and food system changes. | [www.kateraworth.com](http://www.kateraworth.com/)  http://www.eci.ox.ac.uk/ |
| 92 | Food Cardiff | UK | Member of the secretariat of the Food Cardiff Council, working to make Cardiff a Sustainable Food City. | Created in September 2012, it is made up of representatives from Cardiff’s main public organisations, businesses and charities, and it gives advice and support to help local authorities and council members make informed decisions about food. | [www.foodcardiff.com](http://www.foodcardiff.com/) |

**D.- Multi-dimensional Reformers (N=10)**

| **N** | **Name (organization/enterprise/group)** | **Country** | **Position / description of activities** | **Institution** | **Website** |
| --- | --- | --- | --- | --- | --- |
| 4 | University of Alberta | Canada | Researcher at the Indigenous food security project in Canadian arctic, working at the organising Committee of IASC 2015 Conference. | The Faculty of Native Studies will be the organisers of the 15th Biannual International Conference of the International Association for the Study of the Commons (May 2015) | <http://www.iasc2015.org/>  http://nativestudies.ualberta.ca/ |
| 22 | Katholieke Universiteit Leuven | Belgium | PhD researcher on food production with small holders in Mexico using conservation agriculture. | How we can sustain yields with lees external inputs and oil in Chiapas? Department of Earth and Environmental Sciences. | <http://ees.kuleuven.be/> |
| 41 | FEWS NET Famine Early Warning Systems Network | Guatemala | Regional Food Security Analyst. Agronomist with more than 30 years experience in food security and agriculture, having reached ministerial positions. | USAID-funded initiative, implemented by a US consultancy firm, to provide early warning and satellite-based evidence on agriculture, to produce food and nutrition security analyses at country and regional level to reduce chronic and acute malnutrition | <http://www.fews.net/> |
| 42 | Oxford University | UK | Senior researcher | The Oxford Martin Programme on the Future of Food is a University research network carrying out research into a wide range of issues across the food system | <http://www.futureoffood.ox.ac.uk/> |
| 49 | Hunger Solutions Minnesota | USA | Employee | A hunger relief organization, created in 2001 by merging Minnesota Food Bank Network and Minnesota Food Shelf Association, that works to end hunger in Minnesota while seeking long-term systemic solutions to end hunger in the future. We support food pantries and work on food and nutrition policy, advancing public policy and guiding grassroots advocacy on behalf of hungry Minnesotans and the diverse groups that serve them. | [www.hungersolutions.org](http://www.hungersolutions.org/) |
| 50 | University of Sussex | UK | Research on market-related interventions intended to increase access to diverse and nutrient dense foods in Ghana, Nigeria and Tanzania | Institute of Development Studies. Research project funded by DFID involving 10 researchers. The objective is to provide advice to policy makers on how/where they should intervene to improve the delivery of nutritious foods through markets and other channels. And to assess whether this is really relevant for addressing Undernutrition. | <http://www.ids.ac.uk/> |
| 56 | European Commission | International (Belgium) | Officer at DG Dev Nutrition Unit dealing with FNS global governance, SUN Initiative | The EC is the European Union's politically independent executive arm. It draws up proposals for new European legislation, and it implements the decisions of the European Parliament and the Council of the EU. | <http://ec.europa.eu/index_en.htm> |
| 62 | The cotswold chef | UK | Chef and social entrepreneur on food issues, leading an award winning public health charity reducing inequalities in UK & AUS | Technical training, awareness and education activities, the Wiggly Worm charity works with vulnerable, disadvantaged or seldom heard people. Our courses and events motivate people across private public and third sectors on food promotion, behaviour change, lifestyle choices, policy, social prescribing and food poverty. | [www.thecotswoldchef.com](http://www.thecotswoldchef.com/)  http://www.thewigglyworm.org.uk/ |
| 79 | Aware consumer, member of local food groups | USA | Food activist, researcher at university in physics | Participant in advocacy food groups in the city, a neighborhood’s co-op with hundreds of members and read, listen and talk constantly about food sovereignty |  |
| 94 | UK Agricultural Biodiversity Coalition | UK | Employee | An advocacy and communication network that works with the food sovereignty movement to strengthen the alternative modes of production based on agro-ecology, agro-biodiversity and ecological food provision regimes. | [www.ukabc.org](http://www.ukabc.org/) |

**E.- Multi-dimensional Counter-hegemonic Transformers (N=25)**

| **N** | **Name (organization/enterprise**  **/group)** | **Country** | **Position / description of activities** | **Institution** | **Website** |
| --- | --- | --- | --- | --- | --- |
| **3** | Oxfam Intermon | Spain | Policy advisor in charge of advocacy in food, agriculture, climate change. Supervising the Economic Justice campaign. | International development and humanitarian NGO, based in Spain, but a member of the international network of national OXFAMs. Implementing field projects and high-impact research and advocacy campaigns focused on inequality, justice, human rights, food security, water and livelihoods. | <http://www.oxfamintermon.org/> |
| **6** | Shareable | USA | Journalist doing research and articles about ways to democratize the food system along with other areas of the economy. | Shareable is a nonprofit news, action and connection hub for the sharing transformation. We’ve told the stories of sharers to millions of people since 2009. | [www.shareable.net](http://www.shareable.net/) |
| **13** | Souper Saturday | UK | Volunteer activist | We provide meals through a soup kitchen and a safe non-judgemental social environment for homeless and otherwise impoverished people in Edinburgh, Scotland | [https://soupersaturdayblog.wordpress.com](https://soupersaturdayblog.wordpress.com/) |
| **14** | Incredible Edible Bratislava | Slovakia | Advocate of the open movement, agro-ecology, sharing economy and participatory democracy. Based in Bratislava, Slovakia | Planting herbal gardens, vegetables and trees around town, in vacant lots and abandoned places to grow food for all. We’ve planted several orchards and there are more to come. Reproducing the Incredible Edible movement originated in Todmorden, UK. | <https://www.facebook.com/IESVK> |
| **17** | Radboud university | Netherlands | University researcher on motivations to act for Nature, agro-biodiversity and natural resource management | EU-funded project on motivational attitudes and collective actions for nature, including agro-biodiversity and agricultural schemes. | [www.biomotivation.eu](http://www.biomotivation.eu/) |
| **21** | Researcher, anti-poverty activist, journalist | Spain | Researcher, anti-poverty activist, journalist | Lecturing courses on food justice and food systems' visualization. I also blog and advocate on food related issues. Former OXFAM Policy coordinator and advocacy campaigner. Writing a blog on development, justice, media, poverty, hunger in El Pais journal | <Http://gonzalofanjul.com> |
| **23** | Slow Food Youth Network | International (Italy) | Member of the coordinating network secretariat.  Organization of the first Disco Veggie by the Slow Food Youth Network Tokyo. | The SFYN unites groups of active young Slow Food members from all over the globe into one international network. The local groups independently create original and engaging events aimed at raising awareness about food issues and providing means to take action. Such as the Disco Veggies, people cook fresh but unwanted fruit and vegetables that would otherwise have been discarded. The meal was prepared and distributed for free at the sound of music provided by DJs, encouraging a dance celebration while the community worked to organize tasting activities and groceries giveaways. | <http://www.slowfoodyouthnetwork.org/> |
| **25** | Confitures Re-Belles | France | Social entrepreneur, co-founder | Two young social entrepreneurs launched this idea in Paris (Oct 2014). Jar and marmalade producers for short-circuit shops. A gourmet idea to fight against food waste | <https://www.facebook.com/ConfituresReBelles> |
| **27** | Commons Abundance Network | International (USA) | Commons activist mostly working in educational activities at the CAN | Web-based clearing house on Commons. The Commons Abundance Network (CAN) is an emerging co-learning, research, innovation and action network operating both offline and online as an incubator or laboratory for transformative action towards commons based abundance. | <http://commonsabundance.net/home-page/about/objectives/> |
| **29** | Re-Bon (Gleaning Network) Réseau de glanage nantais | France | Member | Re-Bon, french gleaning network that aims to reduce foodwaste by harvesting with volunteers fields that were not supposed to be harvested (over production, esthetic criteria, etc.), and redistribute this food to caritative organisations (foodbank mainly). Re-Bon is part of the European Gleaning network. | http://re-bon.wix.com/re-bon |
| **32** | University of Manitoba | Canada | PhD researcher on indigeneous peoples’ access to foods in protected forests | Protected forests can challenge access to food in conjunction with agribusiness and weak implementation state legal frameworks and/or international human rights. Running a blog presenting research results. | <http://farmsforestsfoods.blogspot.be/>  http://umanitoba.ca/ |
| **48** | Ecologistas en Acción | Spain | Employee | Ecologists in Action is a federation of over 300 environmental groups distributed all over Spain. It develops social ecology, which means that environmental problems stem from a model of production and consumption increasingly globalized, which also derives from other social problems. Awareness campaigns on GMOs, agro-ecology or legal actions against those who harm the environment, while also running innovative & alternative projects in several places. | <http://www.ecologistasenaccion.org/rubrique9.html> |
| **54** | International Forestry Students’ Association | Indonesia | Director | PhD researcher on Forest and Food Security at the Bogor Agricultural University | http://ifsa_lcipb.lk.ipb.ac.id/ |
| **55** | Fair, Green and Global alliance | Netherlands | Coordinator | The Fair Green and Global (FGG) alliance is an alliance of six Dutch civil society organisations. Both Ends, ActionAid, Clean Clothes Campaign, Friends of the Earth Netherlands, SOMO and Transnational Institute. The development, promotion and scaling up of inspiring examples of sustainable development in developing countries including those related to access to food and food security | [www.fairgreenandglobal.org](http://www.fairgreenandglobal.org/) |
| **64** | Eastern Mediterranean Public Health Network | International (Jordan) | Executive director, health researcher | EMPHNET is a group of epidemiologists & public health workers who work to prevent and control diseases, to conduct multidisciplinary research, and to translate research into practice in the Eastern Mediterranean Region. They address nutritional issues related to hunger and obesity in partnerships with WHO, Columbia University, US Centre for Disease Control. | [http://www.emphnet.net](http://www.emphnet.net/) |
| **67** | Proyecto AliMente | Mexico | Core member and media activist | Promoting a social movement to think critically on food issues and the food chain. First campaign “que no te den la espalda” supports breastfeeding in Mexico. Soon to be part of Alianza por la Salud. Organising events on food related issues: where are we? how did we get here? what can we do about it? | [www.quenotedenlaespalda.org](http://www.quenotedenlaespalda.org) |
| **70** | FLACSO-Ecuador | Ecuador | Researcher | Coordinating a research project on agricultural certifications systems (organic and Fair Trade) and public policies in Ecuador. Engaging with producers’ organizations and policy makers in Ecuador during the research process. | <https://www.flacso.edu.ec/portal/> |
| **75** | Taranaki District Health Board | New Zealand | Doctor and food bank volunteer in marginal neighbourhoods of New Plymouth, cooperative member that exchanges food and seeds | Medical doctor (general practitioner) leading the Whanau Pakari Healthy Lifestyle Programme, promoting healthy lifestyles for children in low-income and maori neighbourhoods of New Plymouth, considered as food deserts. Obesity is triggered by ultra-processed easily available food and this doctor works to prevent those eating habits. | <http://www.tdhb.org.nz/patients_visitors/documents/Whanau_Pakari_info_Families.pdf>  <http://www.tdhb.org.nz/> |
| **76** | UN Standing Committee on Nutrition | International (Italy) | Technical officer, UNSCN Secretariat. | Policy advocacy and knowledge-sharing. The mandate of the UNSCN is to promote cooperation among UN agencies and partner organizations in support of community, national, regional, and international efforts to end malnutrition | <http://www.unscn.org/> |
| **78** | Part-Time Carnivore | UK | Member | Small non-profit campaigning organisation based in Cardiff aimed to cut consumption of intensively produced meat. Around 40 institutions have been involved in the campaign | <http://www.parttimecarnivore.org/> |
| **80** | Providencia Municipality | Chile | Public Servant | At the municipality of Providencia, in Santiago, we are developing an urban agriculture plan/strategy. The main objective is to validate urban agriculture as a tool that improves quality of life and helps people become more aware of food systems, facilitating the transition to a more sustainable one. | <http://www.providencia.cl/> |
| **81** | Greenpeace International | International (Netherlands) | Senior Ecological Farming Campaigner | Campaigning on global food and agriculture issues. Objectives: transition to agroecology, by switching investments from pesticides, GM, monocultures, etc. to ecological farming and through mass mobilisation of people as consumer, eaters and citizens | <http://www.greenpeace.org/international/en/> |
| **95** | FAO | International (Italy) | Member of the Secretariat of the Regional Hunger-Free Latin America and Caribbean Initiative. | The Hunger Free Latin America and the Caribbean Initiative is a commitment by the region to eradicate hunger within the term of a generation (2025). It was launched in 2005, the secretariat is provided by FAO and get funds from Spain, Brazil and Mexico. It works in public policies, budget allocations, legal frameworks, strategic thinking, capacity building and communication and awareness. | <http://www.ialcsh.org/es> |
| **96** | Université Catholique de Louvain | Belgium | Senior Lecturer and researcher on agro-ecology at the Earth and Life Institute | Interdisciplinary research projects on food transition, agro-ecology, conventional agriculture and livestock and lecturing. Also some conferences on agroecology | <http://www.uclouvain.be/eli> |
| **98** | Falling Fruit | USA | Co-founder and active board member of Falling Fruit and Boulder Food Rescue | Nonprofit initiative based in Boulder, Colorado that encourages urban foraging throughout the world by crowdsourcing maps with availability of free fruits, vegetables and wasted food. Just in 2014, in Boulder 10,000 lbs food picked, over half donated, 20 events, 215+ volunteer participants. A sister institution “Community Fruit Rescue” inspires Boulder residents to harvest, share, and celebrate the bounty of our urban forest. Our hope is to encourage people to see food (even that growing on private property, especially if it is going to waste) as a commons. We can grow so much more food in cities by even just replacing our current landscaping, if only we decide food is a priority and a public good. | [www.fallingfruit.org](http://www.fallingfruit.org/)  http://fruitrescue.org/ |

**F.- Multi-dimensional Alter-hegemonic Transformers (N=24)**

| **N** | **Name (organization/enterprise**  **/group)** | **Country** | **Position / description of activities** | **Institution** | **Website** |
| --- | --- | --- | --- | --- | --- |
| **7** | CommonSpark | USA | Commons activist and founder | CommonSpark’s mission is to empower sharing communities to reclaim and create commons. Building CommonsScope, a website that will help us see & steward the Commons. They advocate for need for food and food seeds to be recognized and stewarded as a commons to friends and colleagues. | [http://commonsparkcollective.org](http://commonsparkcollective.org/) |
| **8** | Doors of perception | France | Visionary, designer, speaker, writer, social activists, motivational leader on sustainability, social innovation, strategy & bioregionalism | Cutting edge Doors of Perception conferences and xskool workshops have had a food-related focus since 2007 | <http://www.doorsofperception.com/talks/> |
| **12** | Kaskadia | USA | Transition Communicator, Commons Activist | Catalysing the transition to global symbiosis. New Economy. Agroecology. Extremely active in social networks. Involved/networked with local-food, local-economy, resilience groups. Buying food from regional coop, local farmers market. Creating a permaculture Food Forest at home. |  |
| **16** | Food Ethics Council | UK | Staff member | Our organisation brings people to the table to think deeply and find ways through complex ethical challenges in the food system. Independent think tank and charity working with business, governments and civil society towards a fairer future for food and farming | [www.foodethicscouncil.org](http://www.foodethicscouncil.org/) |
| **20** | Katholieke Universiteit Leuven | Belgium | Senior researcher | Research on two-food related projects: collective actions for sustainable food systems in Belgium (project food4Sustainablity funded by Belspo) and on food and nutrition security in the EU (Transmango, FP7 funded). | [www.food4sustainability.be](http://www.food4sustainability.be/) |
| **28** | Australian Food Sovereignty Alliance | Australia | Member of the steering committee | The Australian Food Sovereignty Alliance (AFSA) is working towards a fair, diverse and democratic food system for the benefit of all Australians. They produced the Peoples’ Food Plan for Australia Articulate a vision for a Fair Food Future for Australia | [http://www.australianfoodsovereigntyalliance.org](http://www.australianfoodsovereigntyalliance.org/) |
| **34** | Commons Strategies Group | International (Germany) | Member. Commons activist, thinker, lecturer, often speak in public about commons-based food related initiatives. | The Commons Strategies Group (CSG) is an activist and research driven collaboration to foster the growth of the commons and commoning projects around the world. CSG is focused on seeding new conversations to better understand the commons, convening key players in commons debates, and identifying strategic opportunities for the future. | <http://commonsstrategies.org/about/> |
| **35** | Food Guerrilla | Netherlands | Food activist | Campaigning in Amsterdam and the Netherlands, inspiring people to eat more sustainable and helping small food initiatives to grow till their full potential | <http://www.foodguerrilla.nl/> |
| **37** | International Development Consultant | Spain | International Development Consultant | Writing PhD dissertation on Geographical Indicators under the Transatlantic Trade and Investment Partnership. Participated in several EU Projects related to food market access (Bananas, coffee, etc). Consultant for EU-funded projects in several countries | [www.jesusbores.com](http://www.jesusbores.com/) |
| **52** | GoMarketing Digital Communications | Ireland | Digital Media Consultant | Social enterprise supporting two international NGOs raise awareness for initiatives related to food security | https://twitter.com/gomarketinghub |
| **57** | Katholieke Universiteit Leuven | Belgium | PhD researcher | Research on the role of the institutional context on social innovations in the agroecosystem. Field work in Flanders and Cuba | <http://www.kuleuven.be/english> |
| **58** | CommonsFest | Greece | Organiser | CommonsFest is an initiative (annual festival) born in Greece to promote freedom of knowledge (or free knowledge) and peer-to-peer collaboration for the creation and management of the commons. Through an exhibition, talks, screenings and workshops, the aim of the festival is to promote the achievements of this philosophy to the public and become a motive for further adoption. | [http://commonsfest.info](http://commonsfest.info/) |
| **60** | Humanitarian & food assistance worker | Spain | Humanitarian & food assistance worker | Humanitarian and development professional with experience in humanitarian assistance in conflict-torn regions, country coordination and food security/food assistance projects, monitoring and evaluation |  |
| **61** | University of Sussex | UK | Senior researcher | Institute of Development Studies. Carrying out a participatory research project on agroecology, in which farmers in various countries are actively involved in identifying constraints to and opportunities for scaling up agro-ecological food systems. | [www.ids.ac.uk](http://www.ids.ac.uk/) |
| **63** | Oslo and Akershus University College | Norway | Lecturer and member of the World Public Health Nutrition Association | Working on nutritional public policies globally, but mainly UK and Brazil, engage in nutrition advocacy, capacity building and research. Active in World Public Health Nutrition Association. | <https://www.hioa.no/eng/>  <http://www.wphna.org/> |
| **69** | Katholieke Universiteit Leuven | Belgium | PhD researcher | Involved in Transmango, a project with 13 partners from 12 EU countries that aims to obtain a comprehensive picture of the effects of the global drivers of change on European and global food demand and on raw material production (2014-2018). | [www.transmango.eu](http://www.transmango.eu) |
| **73** | Africans in the Diaspora | USA | Staff working supervising small scale agricultural, food systems and nutrition proposals to get investments. | We mobilize diaspora Africans to invest in grassroots organizations and movements built by Africans. We support economic, education, and leadership initiatives that are nurturing self-reliant individuals and communities. | <http://www.africansinthediaspora.org/> |
| **82** | Stockholm Resilience Centre | Sweden | Senior Researcher, working also in the EAT initiative | Involved in research on food security in the Coral Triangle Initiative in Asia/Pacific. Also involved in various food related research initiatives, including the EAT initiative | <http://www.stockholmresilience.org/> |
| **87** | FLOK Society | Ecuador | Researcher at the core steering group | Research-based public policies towards commons-based open knowledge economy that includes a stream about open and sustainable agri-food systems | <http://floksociety.org/> |
| **88** | WWF | International (Belgium) | Staff member working on food security and the sustainable development goals | Implementing a project titled “Livewell for Life”, funded by the EU, looking at health, nutrition, carbon and affordability. How low-carbon, healthy diets can help us achieve a reduction in greenhouse gas emissions from the EU food supply chain with over 250 stakeholders. | <http://livewellforlife.eu/> |
| **89** | És l'ou - Grup de Consum Ecològic i Local del Terraprim | Spain | Group member | Solidarity purchasing group (established as NGO) with 20 members from Girona, Catalonia, whose main goal is to buy local and organic food and cosmetics | <https://www.facebook.com/eslouTerraprim/> |
| **90** | Building Roots Toronto | Canada | Team member | An initiative linked to Food Forward Toronto, Building Roots hopes to achieve stronger access to healthy food for children and families in diverse and low income neighbourhoods in Toronto through the incorporation of community and commercial food infrastructure being built into new housing developments (community/commercial kitchens, community food hubs, urban agriculture, street food). | <http://www.buildingrootsto.com/> |
| **91** | Scaling Up Nutrition | International (USA) | CSO network coordinator in the SUN secretariat | Scaling Up Nutrition, or SUN, is a unique initiative founded on the principle that all people have a right to food and good nutrition. It unites governments, civil society, United Nations, donors, financial institutions and banks, businesses and researchers in a collective effort to improve nutrition. Although country-led for implementation, the global actions are steered by UN and financed by different donors. | <http://scalingupnutrition.org/> |
| **100** | Local Organic Food Co-ops Network | Canada | Co-operative member and staff | LOFC is an informal network of food and farming co-ops working towards a co-operative and sustainable food system by strengthening the food co-op movement in Ontario. The Network represents more than 70 groups organized co-operatively to address challenges in their community food systems. The primary objectives of the Network are to educate and train, connect, and build capacity of food and farm co-ops in our province | [http://cultivatingfoodcoops.net](http://cultivatingfoodcoops.net/) |
